# Supplementary material for: Synthesis of Highly Conductive Poly(3-hexylthiophene) by Chemical Oxidative Polymerization Using Surfactant Templates
Source: MDPI journal article supplement (doi:10.3390/polym14183860), 2022-09-15
Supplement: s1 [file s1]

# Synthesis of Highly Conductive Poly(3-hexylthiophene) by Chemical Oxidative Polymerization Using Surfactant Templates

Sanhanut Kesornsit <sup>1</sup>, Chatrawee Direksilp <sup>1,2</sup>, Katesara Phasuksom <sup>1,2</sup>, Natlita Thummarungsan <sup>1,2</sup>, Phimchanok Sakunpongpitiporn <sup>1</sup>, Kornkanok Rotjanasuworapong <sup>1</sup>, Anuvat Sirivat <sup>1,2,\*</sup> and Sumonman Niamlang <sup>3,\*</sup>

<sup>1</sup> Conductive and Electroactive Polymers Research Unit, The Petroleum and Petrochemical College, Chulalongkorn University, Bangkok 10330, Thailand;

<sup>2</sup> Center of Excellence on Petrochemical and Materials Technology (PETROMAT), Chulalongkorn University Research Building, Soi Chula 12, Phayathai Road, Bangkok 10330, Thailand

<sup>3</sup> Department of Materials and Metallurgical Engineering, Faculty of Engineering, Rajamangala University of Technology Thanyaburi, Pathumthani 12110, Thailand

\* Correspondence: anuvat.s@chula.ac.th (A.S.); sumonman.n@en.rmutt.ac.th (S.N.); Tel.: +662-218-4131 (A.S.); Fax: +662-611-7221 (A.S.)

## a) Polymerization

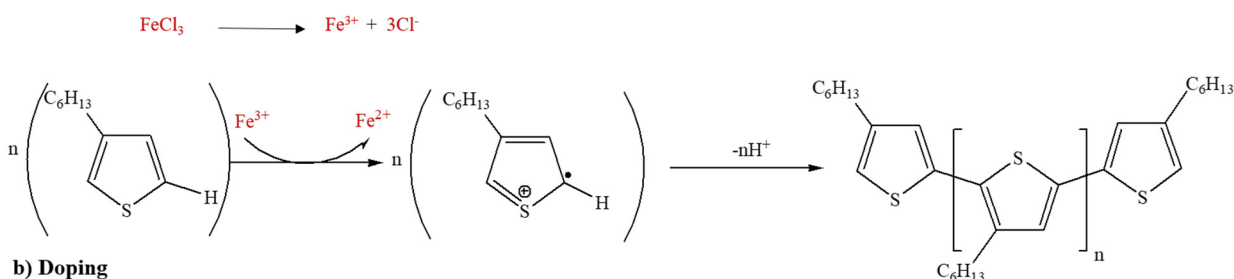

## b) Doping

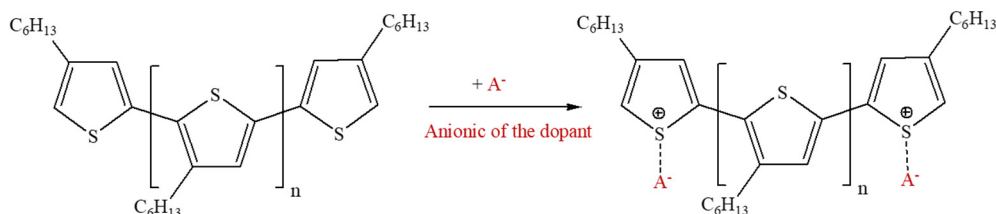

**Figure S1.** Proposed polymerization mechanism of P3HT: (a) polymerization process; (b) doping process.

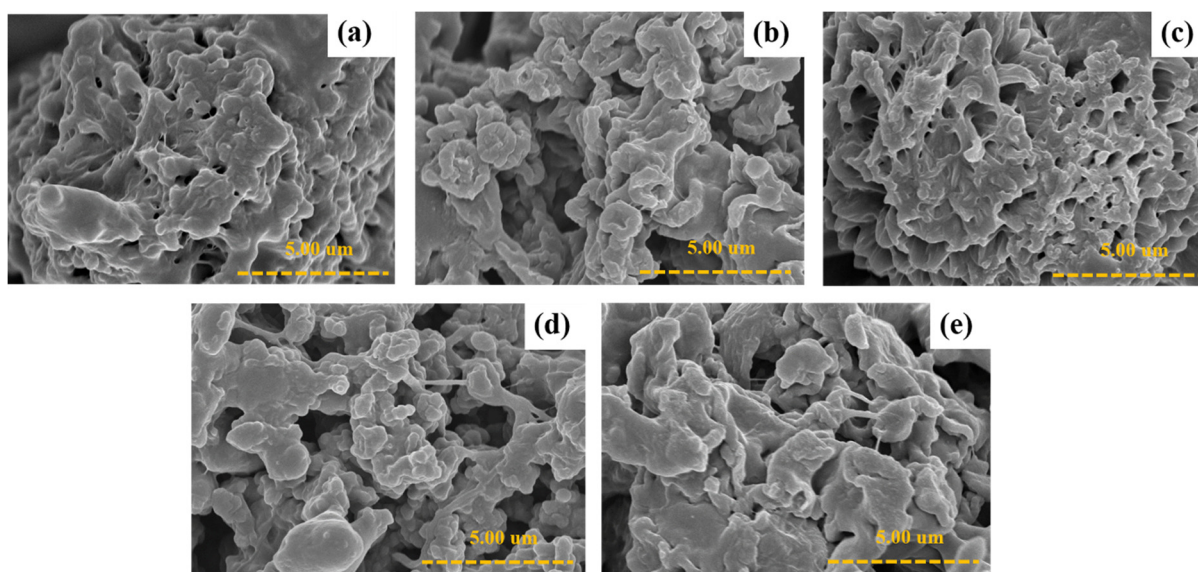

**Figure S2.** SEM images of P3HT synthesized by chemical oxidative polymerization with various PTSA concentrations: (a) P3HT\_PTSA at 2 CMC; (b) P3HT\_PTSA at 4 CMC; (c) P3HT\_PTSA at 6 CMC; (d) P3HT\_PTSA at 8 CMC; and (e) P3HT\_PTSA at 10 CMC.

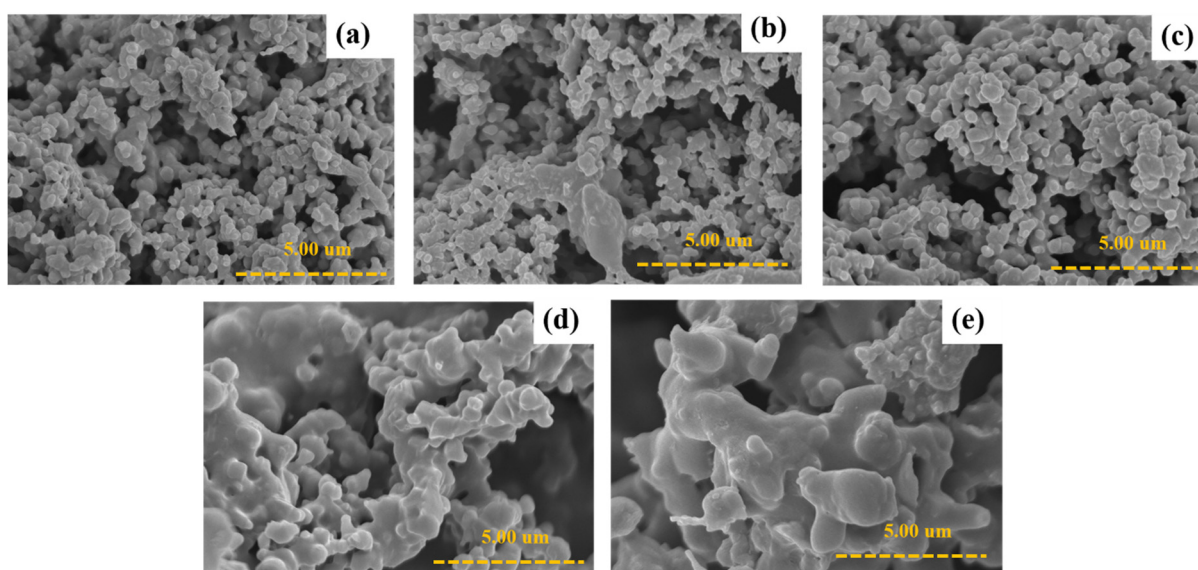

**Figure S3.** SEM images of P3HT synthesized by chemical oxidative polymerization with various SDS concentrations: (a) P3HT\_SDS at 2 CMC; (b) P3HT\_SDS at 4 CMC; (c) P3HT\_SDS at 6 CMC; (d) P3HT\_SDS at 8 CMC; and (e) P3HT\_SDS at 10 CMC.

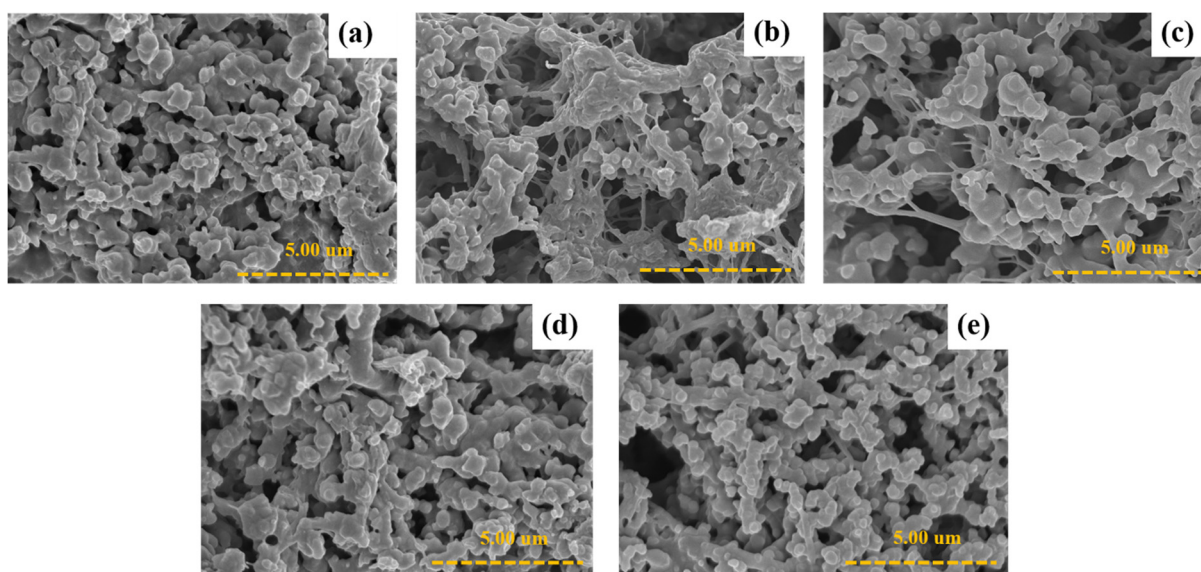

**Figure S4.** SEM images of P3HT synthesized by chemical oxidative polymerization with various AOT concentrations: (a) P3HT\_AOT at 2 CMC; (b) P3HT\_AOT at 4 CMC; (c) P3HT\_AOT at 6 CMC; (d) P3HT\_AOT at 8 CMC; and (e) P3HT\_AOT at 10 CMC.

**Table S1** XPS data of P3HT synthesized with and without surfactant at various oxidant :mole ratios at the polymerization time of 12 h

| Condition/Sample                                                                               | Element (%At) |      |       |      | Cl/S   | Doping level (%) |
|------------------------------------------------------------------------------------------------|---------------|------|-------|------|--------|------------------|
|                                                                                                | C 1s          | S 2p | O 1s  | Cl   |        |                  |
| Effect of oxidant at polymerization time 12 h                                                  |               |      |       |      |        |                  |
| 3HT :FeCl <sub>3</sub> mole ratio of 1 :2.5                                                    | 82.57         | 3.06 | 14.13 | 0.24 | 0.0784 | 7.8              |
| 3HT :FeCl <sub>3</sub> mole ratio of 1 :3                                                      | 82.61         | 6.30 | 9.45  | 1.64 | 0.2603 | 26.0             |
| 3HT :FeCl <sub>3</sub> mole ratio of 1 :3.5                                                    | 89.33         | 5.64 | 4.52  | 0.50 | 0.0886 | 8.9              |
| 3HT :FeCl <sub>3</sub> mole ratio of 1 :4                                                      | 81.27         | 3.03 | 15.48 | 0.22 | 0.0726 | 7.3              |
| Effect of surfactant types at 3HT :FeCl <sub>3</sub> mole ratio of 1 :3                        |               |      |       |      |        |                  |
| P3HT-DBSA (6CMC)                                                                               | 86.18         | 9.14 | 2.71  | 1.97 | 0.2155 | 21.6             |
| P3HT-PTSA (6CMC)                                                                               | 90.79         | 5.68 | 2.45  | 1.08 | 0.1901 | 19.0             |
| P3HT-SDS (6CMC)                                                                                | 86.15         | 9.86 | 2.58  | 1.40 | 0.1419 | 14.2             |
| P3HT-AOT (6CMC)                                                                                | 87.54         | 9.62 | 1.64  | 1.20 | 0.1247 | 12.5             |
| Effect of critical micelle concentrations at 3HT :FeCl <sub>3</sub> mole ratio of 1 :3 in DBSA |               |      |       |      |        |                  |
| P3HT-DBSA (2CMC)                                                                               | 87.35         | 9.72 | 1.78  | 1.15 | 0.1183 | 11.8             |
| P3HT-DBSA (4CMC)                                                                               | 85.58         | 8.59 | 4.25  | 1.58 | 0.1839 | 18.4             |

|                   |       |      |      |      |        |      |
|-------------------|-------|------|------|------|--------|------|
| P3HT-DBSA (6CMC)  | 86.18 | 9.14 | 2.71 | 1.97 | 0.2155 | 21.6 |
| P3HT-DBSA (8CMC)  | 90.25 | 6.29 | 2.48 | 0.99 | 0.1573 | 15.7 |
| P3HT-DBSA (10CMC) | 86.04 | 4.61 | 8.83 | 0.52 | 0.1127 | 11.3 |

**Table S2** XPS data of P3HT synthesized at various doping levels

| Condition/Sample                                                               | Element (%At) |      |      |      | Cl/S   | Doping level (%) |
|--------------------------------------------------------------------------------|---------------|------|------|------|--------|------------------|
|                                                                                | C 1s          | S 2p | O 1s | Cl   |        |                  |
| De-doping/doping of Poly(3-hexylthiophene) by acid dopant (HClO <sub>4</sub> ) |               |      |      |      |        |                  |
| deP3HT_DBSA                                                                    | 86.23         | 9.01 | 2.31 | -    | -      | -                |
| dP3HT_DBSA (1:1)                                                               | 85.11         | 9.12 | 2.55 | 2.89 | 0.3168 | 31.7             |
| dP3HT_DBSA (5:1)                                                               | 84.21         | 8.12 | 2.46 | 3.45 | 0.4248 | 42.5             |
| dP3HT_DBSA (10:1)                                                              | 86.18         | 9.14 | 2.71 | 5.23 | 0.5722 | 57.2             |
| dP3HT_DBSA (25:1)                                                              | 85.21         | 8.99 | 2.03 | 4.25 | 0.4727 | 47.3             |
| dP3HT_DBSA (50:1)                                                              | 86.95         | 9.23 | 2.68 | 4.01 | 0.4344 | 43.4             |
| dP3HT_DBSA (75:1)                                                              | 86.72         | 9.20 | 2.11 | 3.38 | 0.3673 | 36.7             |

**Table S3** Optical band gaps of the deP3HT, dP3HT\_DBSA (1:1), dP3HT\_DBSA (5:1), dP3HT\_DBSA (10:1), dP3HT\_DBSA (25:1), dP3HT\_DBSA (50:1), and dP3HT\_DBSA (75:1)

| Polymers (N <sub>HClO<sub>4</sub></sub> /N <sub>3HT</sub> ) | E <sub>g</sub> (eV) |
|-------------------------------------------------------------|---------------------|
| deP3HT_DBSA (0:0)                                           | 5.95                |
| dP3HT_DBSA (1:1)                                            | 1.36                |
| dP3HT_DBSA (5:1)                                            | 1.20                |
| dP3HT_DBSA (10:1)                                           | 1.10                |
| dP3HT_DBSA (25:1)                                           | 1.26                |
| dP3HT_DBSA (50:1)                                           | 1.40                |
| dP3HT_DBSA (75:1)                                           | 1.48                |

### The calculation of optical band gap energy

From the UV adsorption spectra, the band gap energy was calculated using the Tauc equation (1) (Sakunpongpitiporn et al., 2019):

$$\alpha h\nu = A(h\nu - E_g)^n \quad (1)$$

where  $\alpha$  is the adsorption coefficient,  $h\nu$  is the photon energy (eV),  $h$  is the Plank's constant,  $\nu$  is the frequency ( $s^{-1}$ ),  $A$  is a constant,  $E_g$  is the band gap energy (eV), and  $n$  is equal to 0.5 for the direct transitions. The adsorption coefficient ( $\alpha$ ) was calculated from the Beer-Lambert's relation (2):

$$\alpha = 2.303Ab/I \quad (2)$$

where  $Ab$  is the absorbance, and  $I$  is the sample path length. The extrapolation of the linear line from the plot between  $(\alpha h\nu)^2$  on the y axis and  $h\nu$  on the x axis gives the  $E_g$ .

## Reference

Sakunpongpitiporn, P.; Phasuksom, K.; Paradee, N.; Sirivat, A. Facile synthesis of highly conductive PEDOT: PSS via surfactant templates. *RSC Adv.* **2019**, *9*, 6363-6378.
